# Supplementary material
Source: PubMed Central journal article supplement (PMC5535797)
Supplement: NIHMS880780-supplement-Graphic_Abstract.pdf [file NIHMS880780-supplement-Graphic_Abstract.pdf]

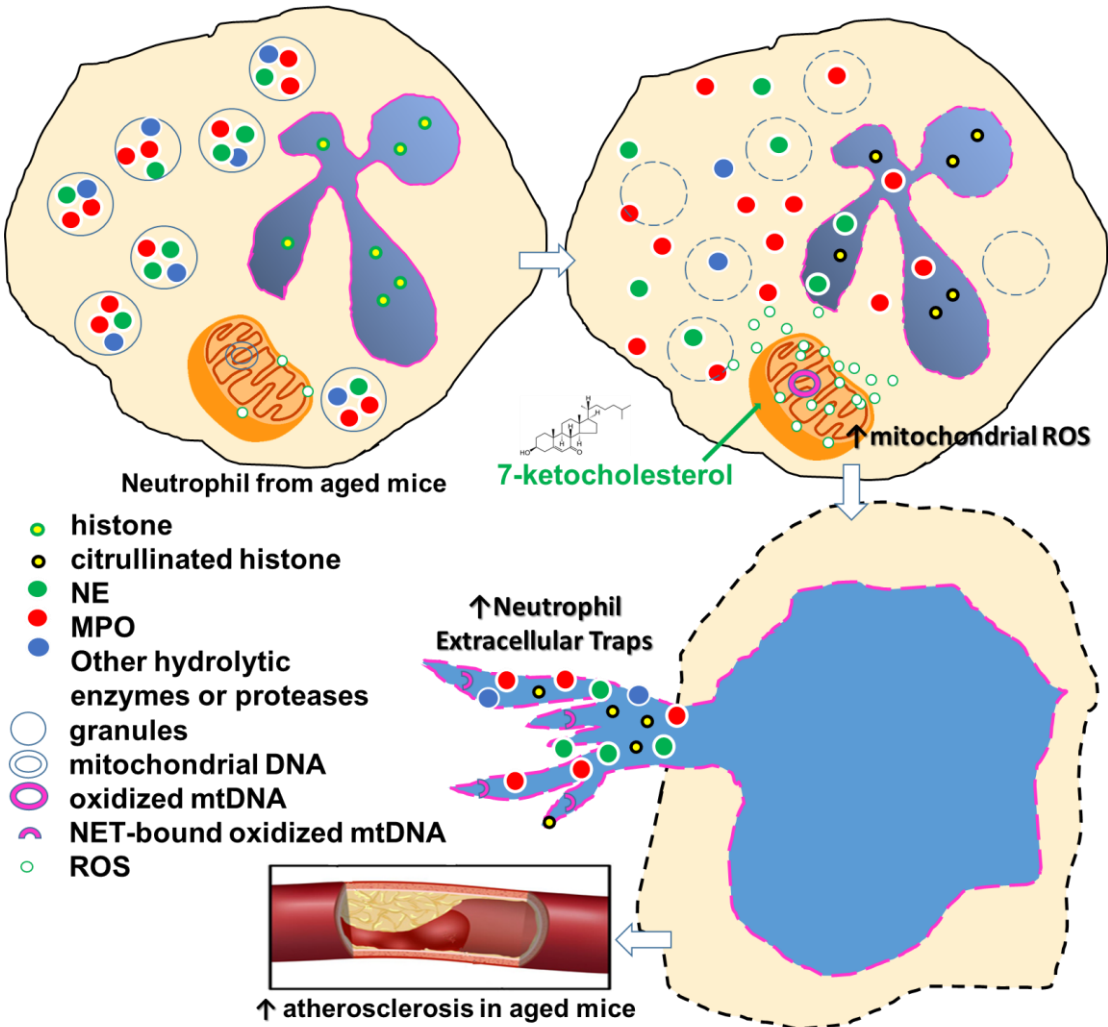

**Mitochondrial oxidative stress promotes neutrophil extracellular traps and atherosclerosis in aged mice**
